# Supplementary material for: A Hypothalamic Mechanism Regulates the Duration of a Migraine Attack: Insights from Microstructural and Temporal Complexity of Cortical Functional Networks Analysis
Source: MDPI journal article supplement (doi:10.3390/ijms232113238), 2022-10-31
Supplement: s1 [file s1]

| <b>Network</b>              | <b>Independent Component,<br/>correlation index</b> |                                  |                                  |
|-----------------------------|-----------------------------------------------------|----------------------------------|----------------------------------|
| <i>Cerebellum</i>           | <i>IC1<br/>0.36</i>                                 |                                  |                                  |
| <i>Salience</i>             | <i>IC10, IC19<br/>0.32, 0.25</i>                    |                                  |                                  |
| <i>Auditory</i>             | <i>IC2<br/>0.38</i>                                 |                                  |                                  |
| <i>Dorsal<br/>attention</i> | <i>IC6, IC17<br/>0.21, 0.24</i>                     |                                  |                                  |
| <i>Default<br/>Mode</i>     | <i>IC27, IC28, IC31<br/>0.10, 0.64, 0.19</i>        | <i>IC25, IC21<br/>0.17, 0.17</i> | <i>IC20, IC15<br/>0.29, 0.25</i> |
| <i>Frontal<br/>parietal</i> | <i>IC3, IC23<br/>0.31, 0.32</i>                     |                                  |                                  |
| <i>Language</i>             | <i>IC26<br/>0.21</i>                                |                                  |                                  |
| <i>Sensory<br/>motor</i>    | <i>IC33, IC7<br/>0.21, 0.19</i>                     | <i>IC8<br/>0.14</i>              |                                  |
| <i>Visual</i>               | <i>IC24<br/>0.36</i>                                | <i>IC11<br/>0.22</i>             |                                  |

**Supplementary Table S1:** Correlation's values for each network previously identified with reference to the networks' templates
